# Supplementary material for: Enhanced photocatalytic hydrogen evolution from cation modified single perovskite niobates in the absence of noble metal cocatalysts
Source: Royal Society of Chemistry journal article supplement (doi:10.1039/d4nj02899f), 2024-01-01
Supplement: d4nj02899f1.pdf [file d4nj02899f1.pdf]

**Supplementary information**

**Enhanced photocatalytic hydrogen evolution from cation modified single perovskite niobates in the absence of noble metal cocatalysts**

Preeti Dahiya<sup>a</sup> and Tapas Kumar Mandal\*<sup>a,b</sup>

*Department of Chemistry, Indian Institute of Technology Roorkee, Roorkee – 247667, India.*

*Center for Nanotechnology, Indian Institute of Technology Roorkee, Roorkee – 247667, India*

**Table S1.** Composition and synthesis temperature for  $\text{Na}_{0.5}\text{Sr}_{0.5}\text{M}_{0.25}\text{Nb}_{0.75}\text{O}_3$  (M = Cr, Mn, Fe, and Co).

| Sr. No. | Chemical composition                                                       | Synthesis condition                             | Colour                                                                               |
|---------|----------------------------------------------------------------------------|-------------------------------------------------|--------------------------------------------------------------------------------------|
| 1.      | $\text{Na}_{0.5}\text{Sr}_{0.5}\text{Cr}_{0.25}\text{Nb}_{0.75}\text{O}_3$ | 850 °C/12 h; 950 °C/12 h; 1000 °C/24h<br>in air |   |
| 2.      | $\text{Na}_{0.5}\text{Sr}_{0.5}\text{Mn}_{0.25}\text{Nb}_{0.75}\text{O}_3$ | 850 °C/12 h; 950 °C/12 h; 1000 °C/24h<br>in air |   |
| 3.      | $\text{Na}_{0.5}\text{Sr}_{0.5}\text{Fe}_{0.25}\text{Nb}_{0.75}\text{O}_3$ | 850 °C/12 h; 950 °C/12 h; 1000 °C/24h<br>in air |   |
| 4.      | $\text{Na}_{0.5}\text{Sr}_{0.5}\text{Co}_{0.25}\text{Nb}_{0.75}\text{O}_3$ | 850 °C/12 h; 950 °C/12 h; 1000 °C/24h<br>in air |  |

**Table S2.** Position, thermal and occupancy parameters for  $\text{Na}_{0.5}\text{Sr}_{0.5}\text{M}_{0.25}\text{Nb}_{0.75}\text{O}_3$  (M = Cr, Mn, Fe, and Co).

| Wyckoff | Atom  | Position | M = Cr   | M = Mn   | M = Fe   | M = Co   | Occupancy |
|---------|-------|----------|----------|----------|----------|----------|-----------|
| 4c      | Na/Sr | x        | 0        | 0        | 0        | 0        | 0.5       |
|         |       | y        | 0        | 0        | 0        | 0        |           |
|         |       | z        | 0        | 0        | 0        | 0        |           |
|         |       | B        | 0.671(1) | 0.607(1) | 0.364(1) | 0.163(1) |           |
| 4b      | M/Nb  | x        | 0.5      | 0.5      | 0.5      | 0.5      | 0.25/0.75 |
|         |       | y        | 0.5      | 0.5      | 0.5      | 0.5      |           |
|         |       | z        | 0.5      | 0.5      | 0.5      | 0.5      |           |
|         |       | B        | 0.095(2) | 0.596(1) | 0.038(2) | 0.396(1) |           |
| 4c      | O1    | x        | 0        | 0        | 0        | 0.0      | 1         |
|         |       | y        | 0.5      | 0.5      | 0.5      | 0.5      |           |
|         |       | z        | 0.5      | 0.5      | 0.5      | 0.5      |           |
|         |       | B        | 1.109(1) | 2.131(1) | 1.557(1) | 2.577(1) |           |

**Table S3.** Refined cell parameters and reliability factors for  $\text{Na}_{0.5}\text{Sr}_{0.5}\text{M}_{0.25}\text{Nb}_{0.75}\text{O}_3$  (M = Cr, Mn, Fe, and Co).

| Parameters             | M = Cr    | M = Mn    | M = Fe     | M = Co    |
|------------------------|-----------|-----------|------------|-----------|
| a = b = c (Å)          | 3.9394(1) | 3.9554(1) | 3.9502 (1) | 3.9721(1) |
| R <sub>Bragg</sub> (%) | 1.61      | 3.15      | 2.22       | 3.07      |
| R <sub>f</sub> (%)     | 1.52      | 2.69      | 1.89       | 2.59      |
| R <sub>p</sub> (%)     | 4.14      | 5.32      | 4.47       | 3.49      |
| R <sub>wp</sub> (%)    | 5.49      | 7.52      | 6.27       | 5.23      |
| $\chi^2$               | 3.47      | 6.28      | 5.49       | 5.42      |

**Table S4.** Bond distances for  $\text{Na}_{0.5}\text{Sr}_{0.5}\text{M}_{0.25}\text{Nb}_{0.75}\text{O}_3$  (M = Cr, Mn, Fe, and Co).

| Type of Bond | Bond distance (Å) |           |           |           |
|--------------|-------------------|-----------|-----------|-----------|
|              | Cr                | Mn        | Fe        | Co        |
| M/Nb–O1 × 6  | 1.9697(1)         | 1.9777(1) | 1.9751(2) | 1.9860(2) |

**Table S5.** Tolerance factor *t* for  $\text{Na}_{0.5}\text{Sr}_{0.5}\text{M}_{0.25}\text{Nb}_{0.75}\text{O}_3$  (M = Cr, Mn, Fe, and Co).

| Compound<br>$\text{Na}_{0.5}\text{Sr}_{0.5}\text{M}_{0.25}\text{Nb}_{0.75}\text{O}_3$ | Tolerance factor <i>t</i><br>Low spin | Tolerance factor <i>t</i><br>High spin |
|---------------------------------------------------------------------------------------|---------------------------------------|----------------------------------------|
| M = Cr                                                                                | 0.9789                                | 0.9789                                 |
| M = Mn                                                                                | 0.9831                                | 0.9753                                 |
| M = Fe                                                                                | 0.9868                                | 0.9753                                 |
| M = Co                                                                                | 0.9874                                | 0.9795                                 |

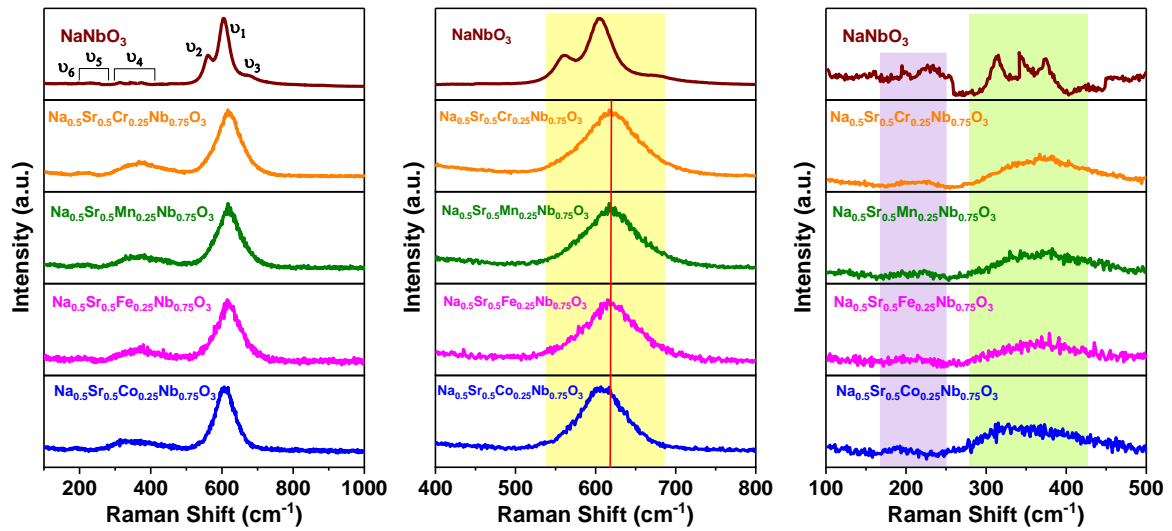

**Fig. S1** Raman Spectra of  $\text{NaNbO}_3$  and  $\text{Na}_{0.5}\text{Sr}_{0.5}\text{M}_{0.25}\text{Nb}_{0.75}\text{O}_3$  ( $\text{M} = \text{Cr}, \text{Mn}, \text{Fe}, \text{and Co}$ ).

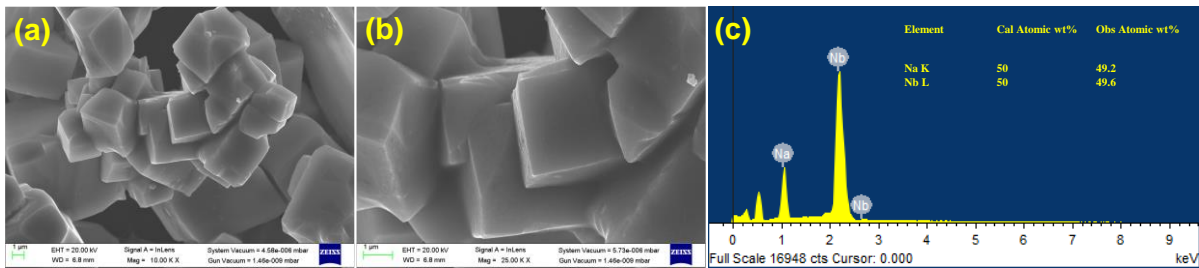

**Fig. S2** (a-b) FE-SEM and (c) EDX data for  $\text{NaNbO}_3$ .

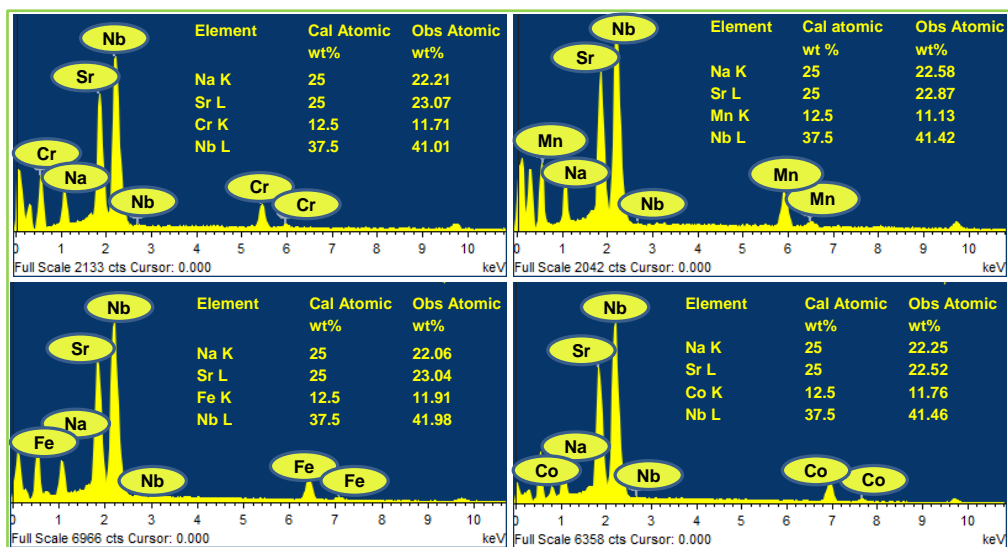

**Fig. S3** EDX analysis of the  $\text{Na}_{0.5}\text{Sr}_{0.5}\text{M}_{0.25}\text{Nb}_{0.75}\text{O}_3$  ( $\text{M} = \text{Cr}, \text{Mn}, \text{Fe}, \text{and Co}$ ).

**Table S6.** Compositions of the  $\text{Na}_{0.5}\text{Sr}_{0.5}\text{M}_{0.25}\text{Nb}_{0.75}\text{O}_3$  ( $\text{M} = \text{Cr}, \text{Mn}, \text{Fe}, \text{and Co}$ ) determined by ICP-MS.

| Compound                                                                   | Na   | Sr   | M    | Nb   |
|----------------------------------------------------------------------------|------|------|------|------|
| $\text{NaNbO}_3$                                                           | 1    | ---  | ---  | 0.99 |
| $\text{Na}_{0.5}\text{Sr}_{0.5}\text{Cr}_{0.25}\text{Nb}_{0.75}\text{O}_3$ | 0.49 | 0.48 | 0.23 | 0.73 |
| $\text{Na}_{0.5}\text{Sr}_{0.5}\text{Mn}_{0.25}\text{Nb}_{0.75}\text{O}_3$ | 0.49 | 0.48 | 0.23 | 0.74 |
| $\text{Na}_{0.5}\text{Sr}_{0.5}\text{Fe}_{0.25}\text{Nb}_{0.75}\text{O}_3$ | 0.48 | 0.49 | 0.24 | 0.73 |
| $\text{Na}_{0.5}\text{Sr}_{0.5}\text{Co}_{0.25}\text{Nb}_{0.75}\text{O}_3$ | 0.48 | 0.49 | 0.23 | 0.73 |

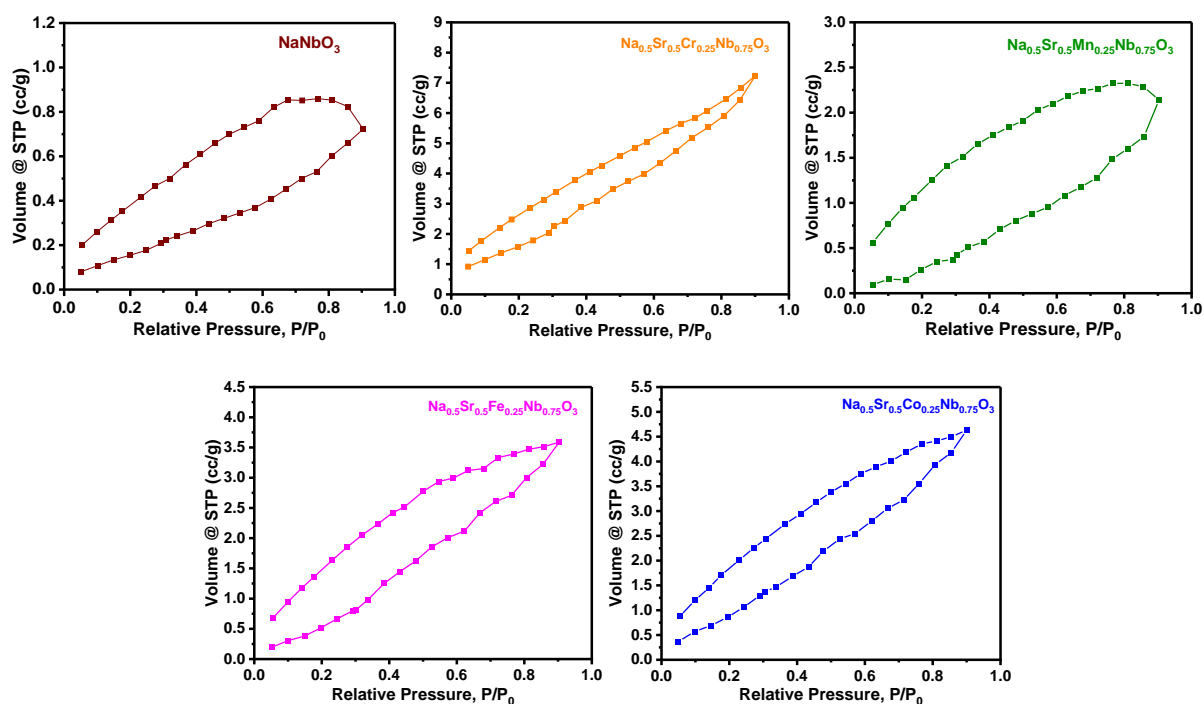

**Fig. S4.** BET adsorption isotherm for  $\text{NaNbO}_3$  and  $\text{Na}_{0.5}\text{Sr}_{0.5}\text{M}_{0.25}\text{Nb}_{0.75}\text{O}_3$  ( $\text{M} = \text{Cr}, \text{Mn}, \text{Fe}, \text{and Co}$ ).

**Table S7.** The specific surface area of  $\text{Na}_{0.5}\text{Sr}_{0.5}\text{M}_{0.25}\text{Nb}_{0.75}\text{O}_3$  ( $\text{M} = \text{Cr}, \text{Mn}, \text{Fe}, \text{and Co}$ ).

| Compound                                                                   | Specific surface area ( $\text{m}^2/\text{g}$ ) |
|----------------------------------------------------------------------------|-------------------------------------------------|
| $\text{NaNbO}_3$                                                           | 0.73                                            |
| $\text{Na}_{0.5}\text{Sr}_{0.5}\text{Cr}_{0.25}\text{Nb}_{0.75}\text{O}_3$ | 6.60                                            |
| $\text{Na}_{0.5}\text{Sr}_{0.5}\text{Mn}_{0.25}\text{Nb}_{0.75}\text{O}_3$ | 1.70                                            |
| $\text{Na}_{0.5}\text{Sr}_{0.5}\text{Fe}_{0.25}\text{Nb}_{0.75}\text{O}_3$ | 3.10                                            |
| $\text{Na}_{0.5}\text{Sr}_{0.5}\text{Co}_{0.25}\text{Nb}_{0.75}\text{O}_3$ | 5.37                                            |

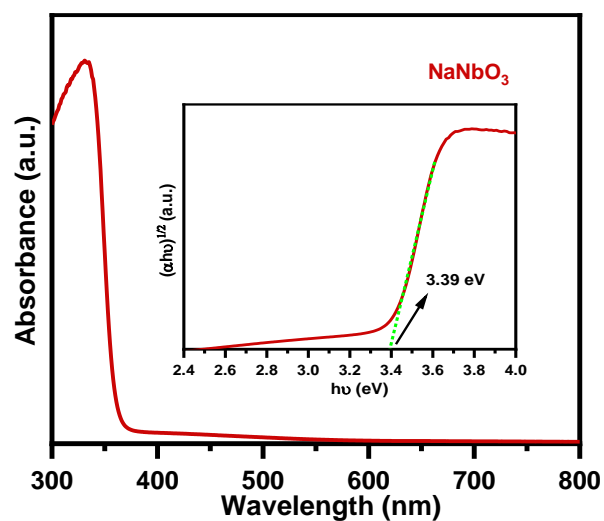

**Fig. S5** UV-Vis DRS absorption spectra and the corresponding Tauc plot (inset) of NaNbO<sub>3</sub>.

**Table S8.** Band gap data of Na<sub>0.5</sub>Sr<sub>0.5</sub>M<sub>0.25</sub>Nb<sub>0.75</sub>O<sub>3</sub> (M = Cr, Mn, Fe, and Co).

| Compounds                                                                                | Band gap (eV)      |                    |
|------------------------------------------------------------------------------------------|--------------------|--------------------|
|                                                                                          | E <sub>g</sub> (1) | E <sub>g</sub> (2) |
| NaNbO <sub>3</sub>                                                                       | 3.39               |                    |
| Na <sub>0.5</sub> Sr <sub>0.5</sub> Cr <sub>0.25</sub> Nb <sub>0.75</sub> O <sub>3</sub> | 2.17               | ----               |
| Na <sub>0.5</sub> Sr <sub>0.5</sub> Mn <sub>0.25</sub> Nb <sub>0.75</sub> O <sub>3</sub> | 1.75               | 2.15               |
| Na <sub>0.5</sub> Sr <sub>0.5</sub> Fe <sub>0.25</sub> Nb <sub>0.75</sub> O <sub>3</sub> | 2.07               | 2.45               |
| Na <sub>0.5</sub> Sr <sub>0.5</sub> Co <sub>0.25</sub> Nb <sub>0.75</sub> O <sub>3</sub> | 2.0                | ----               |

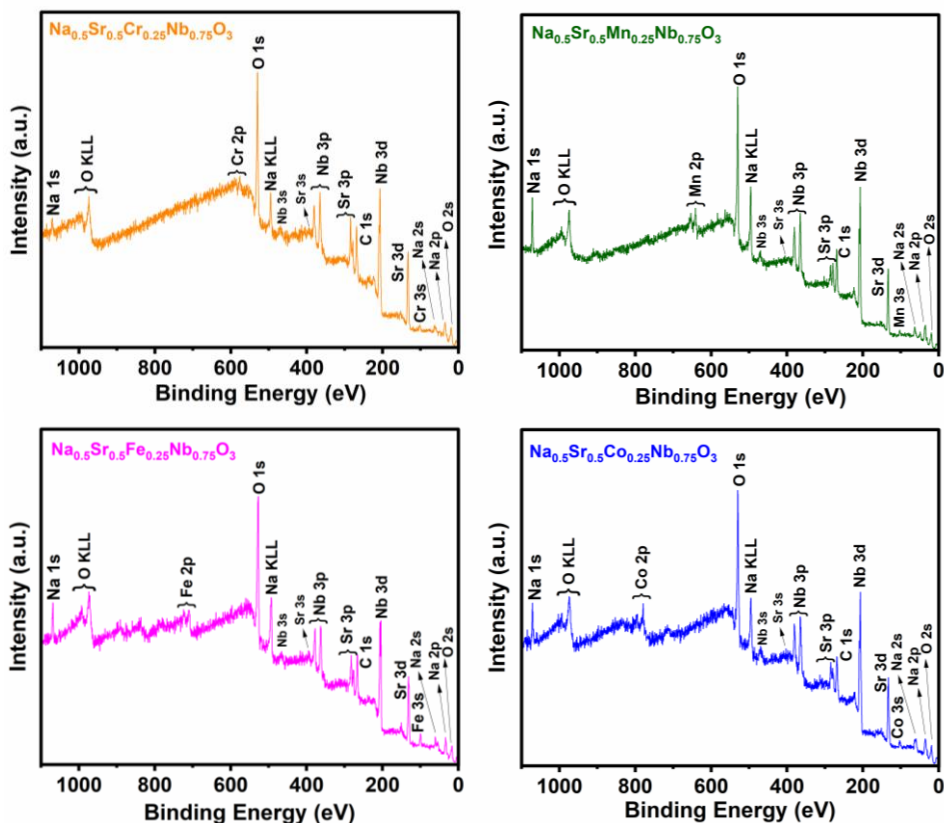

**Fig. S6** XPS Survey spectra of  $\text{Na}_{0.5}\text{Sr}_{0.5}\text{M}_{0.25}\text{Nb}_{0.75}\text{O}_3$  ( $\text{M} = \text{Cr}, \text{Mn}, \text{Fe}, \text{and Co}$ ).

**Table S9.** XPS binding energies (in eV) of Na 1s, Sr 2p, M 2p and Nb 3d for  $\text{Na}_{0.5}\text{Ca}_{0.5}\text{M}_{0.25}\text{Nb}_{0.75}\text{O}_3$  ( $\text{M} = \text{Cr}, \text{Mn}, \text{Fe}, \text{and Co}$ ).

|                                                                            | Na 1s  | Sr 2p             |                   | M 2p              |                   | Nb 3d             |                   |
|----------------------------------------------------------------------------|--------|-------------------|-------------------|-------------------|-------------------|-------------------|-------------------|
|                                                                            |        | 2p <sub>3/2</sub> | 2p <sub>1/2</sub> | 2p <sub>3/2</sub> | 2p <sub>1/2</sub> | 3d <sub>5/2</sub> | 3d <sub>3/2</sub> |
| $\text{Na}_{0.5}\text{Sr}_{0.5}\text{Cr}_{0.25}\text{Nb}_{0.75}\text{O}_3$ | 1070.8 | 132.3             | 134.0             | 575.9             | 585.8             | 206.2             | 208.9             |
| $\text{Na}_{0.5}\text{Sr}_{0.5}\text{Mn}_{0.25}\text{Nb}_{0.75}\text{O}_3$ | 1070.8 | 132.2             | 134.0             | 640.3             | 652.3             | 206.2             | 208.9             |
| $\text{Na}_{0.5}\text{Sr}_{0.5}\text{Fe}_{0.25}\text{Nb}_{0.75}\text{O}_3$ | 1071.5 | 132.8             | 134.6             | 711.3             | 724.9             | 206.5             | 209.2             |
| $\text{Na}_{0.5}\text{Sr}_{0.5}\text{Co}_{0.25}\text{Nb}_{0.75}\text{O}_3$ | 1071.5 | 132.9             | 134.8             | 780<br>777.5      | 796.5<br>794.2    | 206.7             | 209.4             |

**Table S10.** EIS circuit fitting parameters.

| Compound                                                                   | Circuit Elements Value |                       |            |                    |            |
|----------------------------------------------------------------------------|------------------------|-----------------------|------------|--------------------|------------|
|                                                                            | $R_s$ ( $\Omega$ )     | $R_{ct}$ ( $\Omega$ ) | $CPE_1$    | $R_1$ ( $\Omega$ ) | $CPE_2$    |
| $\text{Na}_{0.5}\text{Sr}_{0.5}\text{Cr}_{0.25}\text{Nb}_{0.75}\text{O}_3$ | 0.05                   | 1850                  | 5.1935E-05 | 51.508             | 7.1423E-08 |
| $\text{Na}_{0.5}\text{Sr}_{0.5}\text{Mn}_{0.25}\text{Nb}_{0.75}\text{O}_3$ | 2.65                   | 4148                  | 6.6297E-05 | 50.781             | 1.8460E-07 |
| $\text{Na}_{0.5}\text{Sr}_{0.5}\text{Fe}_{0.25}\text{Nb}_{0.75}\text{O}_3$ | 0.10                   | 2401                  | 2.0850E-04 | 47.125             | 3.7394E-07 |
| $\text{Na}_{0.5}\text{Sr}_{0.5}\text{Co}_{0.25}\text{Nb}_{0.75}\text{O}_3$ | 2.54                   | 2198                  | 4.2144E-05 | 56.277             | 1.0311E-07 |

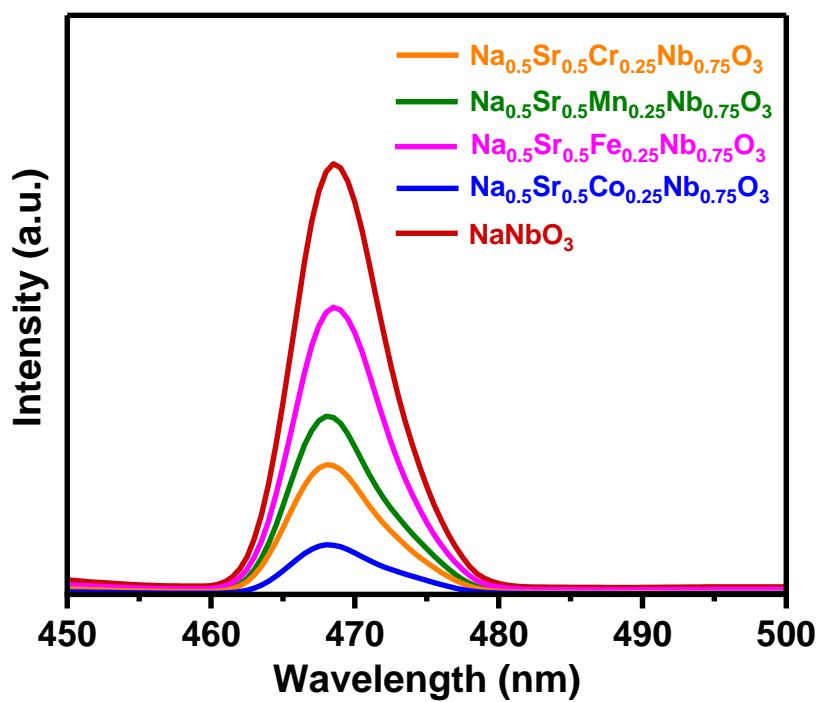

**Fig. S7** Steady-state photoluminescence spectra of  $\text{NaNbO}_3$  and  $\text{Na}_{0.5}\text{Sr}_{0.5}\text{M}_{0.25}\text{Nb}_{0.75}\text{O}_3$  ( $\text{M} = \text{Cr, Mn, Fe, and Co}$ )

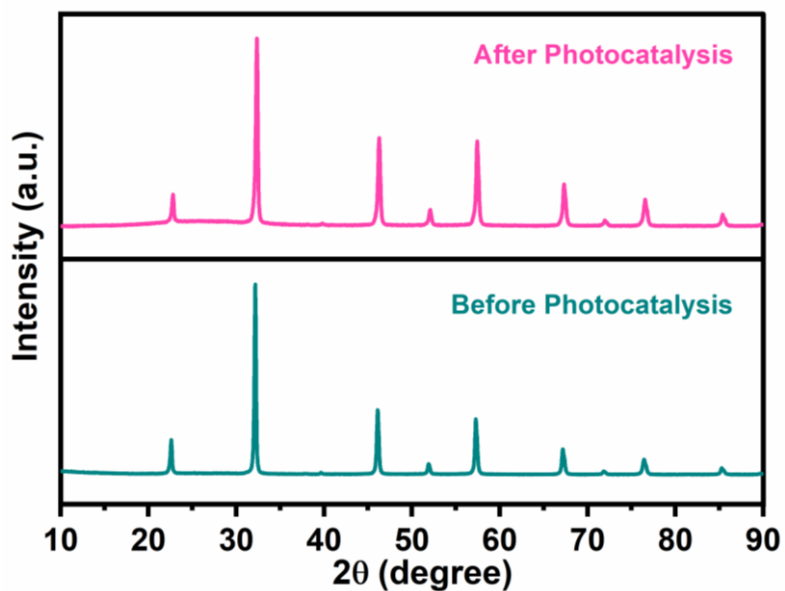

**Fig. S8** PXRD data of  $\text{Na}_{0.5}\text{Sr}_{0.5}\text{Cr}_{0.25}\text{Nb}_{0.75}\text{O}_3$  before and after photocatalysis.



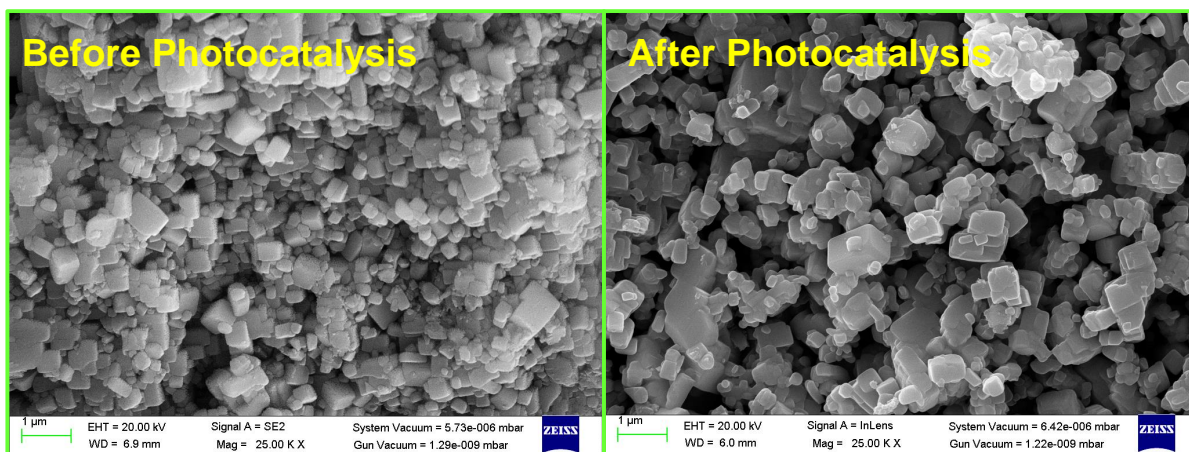

**Fig. S9** FE-SEM images of  $\text{Na}_{0.5}\text{Sr}_{0.5}\text{Cr}_{0.25}\text{Nb}_{0.75}\text{O}_3$  before and after photocatalysis.

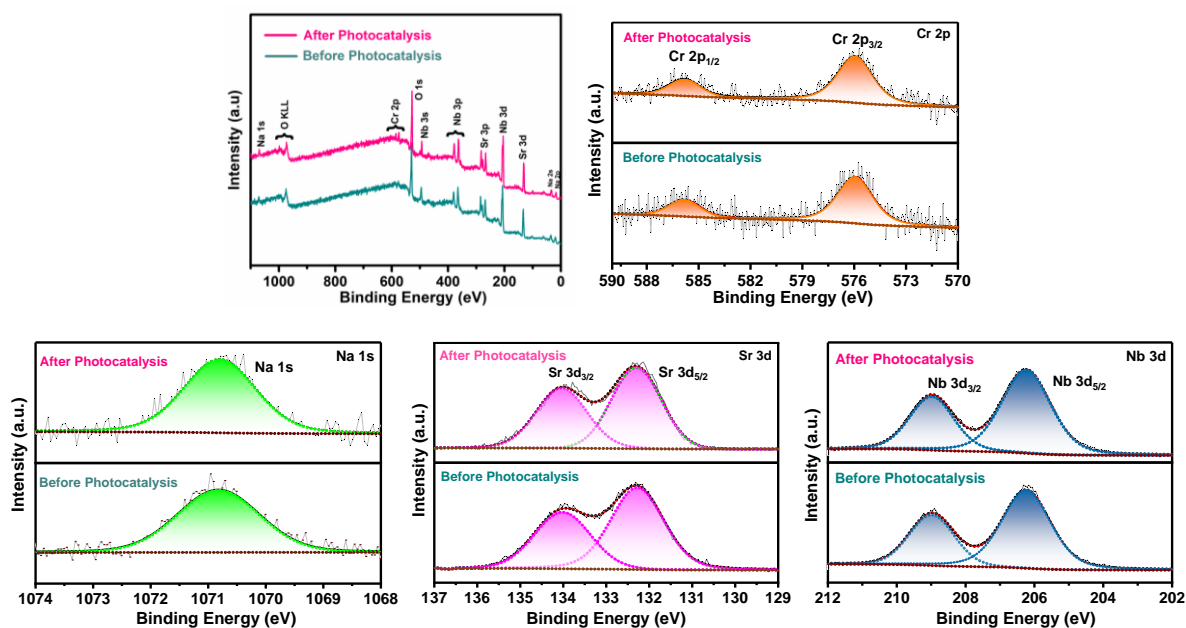

**Fig. S10** Binding energy of the  $\text{Na}_{0.5}\text{Sr}_{0.5}\text{Cr}_{0.25}\text{Nb}_{0.75}\text{O}_3$  for Cr 2p, Na 1s, Sr 3d and Nb 3d before and after photocatalysis.

**Table S11.** Comparative assessment of the photocatalytic activity of  $\text{Na}_{0.5}\text{Sr}_{0.5}\text{M}_{0.25}\text{Nb}_{0.75}\text{O}_3$ 

(M = Cr, Fe and Co) with other catalysts reported in literature.

| S. No. | Photocatalyst                                                                | Co-catalyst | Light source                               | Sacrificial agent                                  | $\text{H}_2$ evolved ( $\mu\text{mol h}^{-1} \text{g}^{-1}$ ) | Ref.      |
|--------|------------------------------------------------------------------------------|-------------|--------------------------------------------|----------------------------------------------------|---------------------------------------------------------------|-----------|
| 1.     | $\text{Na}_{0.5}\text{Sr}_{0.5}\text{Cr}_{0.25}\text{Nb}_{0.75}\text{O}_3$   | None        | 250W Medium Pressure Hg-vapor lamp         | Methanol (20 vol %)                                | 188                                                           | This work |
| 2.     | $\text{Na}_{0.5}\text{Sr}_{0.5}\text{Co}_{0.25}\text{Nb}_{0.75}\text{O}_3$   | None        | 250W Medium Pressure Hg-vapor lamp         | Methanol (20 vol %)                                | 62                                                            | This work |
| 3.     | $\text{Na}_{0.5}\text{Sr}_{0.5}\text{Fe}_{0.25}\text{Nb}_{0.75}\text{O}_3$   | None        | 250W Medium Pressure Hg-vapor lamp         | Methanol (20 vol %)                                | 54.6                                                          | This work |
| 4.     | $\text{CaTiO}_3$ : Rh                                                        | Pt          | 300-W Xe lamp ( $\lambda > 420$ nm)        | Methanol                                           | 28.3                                                          | [1]       |
| 5.     | Mo-doped $\text{BaTiO}_3$                                                    | Pt          | 300 W Xe lamp                              | Aqueous methyl alcohol solution                    | 63                                                            | [2]       |
| 6.     | $\text{CdSe QDs/BaTiO}_3$                                                    | None        | 300 W Xe lamp ( $\lambda > 420$ nm)        | $\text{Na}_2\text{SO}_3$ and $\text{Na}_2\text{S}$ | 53.4                                                          | [3]       |
| 7.     | Cu doped- $\text{PbTiO}_3$                                                   | None        | 125 W, medium pressure Hg lamp             | Methanol (10 vol %)                                | 90                                                            | [4]       |
| 8.     | $\text{PbTiO}_3/\text{LaCrO}_3$                                              | None        | 150W Xe lamp, $\lambda \geq 400$ nm        | Methanol (10 vol %)                                | 171.7                                                         | [5]       |
| 9.     | $\text{SrTiO}_3$ :Rh                                                         | Pt          | 300-W Xe lamp ( $\lambda > 440$ nm)        | Methanol                                           | 390                                                           | [6]       |
| 10.    | $\text{SrTiO}_3$ : Ir                                                        | Pt          | 300-W Xe lamp ( $\lambda > 440$ nm)        | Methanol                                           | 28.7                                                          | [6]       |
| 11.    | $\text{SrTiO}_3$ : Ni/Ta                                                     | None        | Xe lamp                                    | Methanol                                           | 2.4                                                           | [7]       |
| 12.    | $\text{SrTiO}_3$ : Cr/Sb                                                     | None        | Xe lamp                                    | Methanol                                           | 78                                                            | [8]       |
| 13.    | Cr, Ta co-doped $\text{SrTiO}_3$                                             | Pt          | 300 W Xe lamp ( $\lambda > 420$ nm)        | Methanol (10 vol %)                                | 122.6                                                         | [9]       |
| 14.    | $\text{La}_2\text{Ti}_2\text{O}_7$ : Cr                                      | Pt          | 500-W Hg lamp ( $\lambda > 420$ nm)        | Methanol                                           | 30                                                            | [10]      |
| 15.    | $\text{La}_2\text{Ti}_2\text{O}_7$ : Fe                                      | Pt          | 500-W Hg lamp ( $\lambda > 420$ nm)        | Methanol                                           | 20                                                            | [10]      |
| 16.    | $\text{Ag-NaTaO}_3$                                                          | None        | 300 W Xe lamp                              | Methanol (25 vol %)                                | 3.54                                                          | [11]      |
| 17.    | $\text{Ag-KTaO}_3$                                                           | None        | 300 W Xe lamp                              | Methanol (25 vol %)                                | 185.60                                                        | [11]      |
| 18.    | $\text{NaTaO}_3$ : La/Cr                                                     | Pt          | 300 W Xe lamp ( $\lambda > 420$ nm)        | Methanol (20 vol%)                                 | 4.4                                                           | [12]      |
| 19.    | g- $\text{C}_3\text{N}_4/\text{SrTa}_2\text{O}_6$                            | Pt          | 300 W Xe lamp ( $\lambda > 420$ nm)        | TEOA (5 vol %)                                     | 37.2                                                          | [13]      |
| 20.    | $\text{CdS/Ni/KNbO}_3$                                                       | None        | 500 W lamp                                 | Methanol (50 vol %)                                | 23.5                                                          | [14]      |
| 21.    | $\text{SnNb}_2\text{O}_6$ nanosheets                                         | Pt          | 300 W Hg-arc lamp ( $\lambda \geq 420$ nm) | Lactic acid (20 vol%)                              | 264                                                           | [15]      |
| 22.    | $\text{LaFeO}_3/\text{g-C}_3\text{N}_4$                                      | NiS         | 300 W Xe lamp                              | Ethanol                                            | 121.0                                                         | [16]      |
| 23.    | $\text{Sr}_{0.85}\text{Bi}_{0.15}\text{Ti}_{0.85}\text{Cr}_{0.15}\text{O}_3$ | Pt          | 300 W Xe lamp ( $\lambda > 420$ nm)        | Methanol (10 vol %)                                | 3.7                                                           | [17]      |
| 24.    | $\text{Sr}_2\text{Ti}_{0.9}\text{Cr}_{0.1}\text{O}_{4-\delta}$               | Pt          | 500 W high-pressure Hg lamp                | $\text{Na}_2\text{SO}_3$                           | 17.0                                                          | [18]      |

|     |                                                                  |    |                             |                          |      |      |
|-----|------------------------------------------------------------------|----|-----------------------------|--------------------------|------|------|
| 25. | $\text{Sr}_2\text{Ti}_{0.95}\text{Cr}_{0.05}\text{O}_{4-\delta}$ | Pt | 500 W high-pressure Hg lamp | $\text{Na}_2\text{SO}_3$ | 97.7 | [18] |
|-----|------------------------------------------------------------------|----|-----------------------------|--------------------------|------|------|

## REFERENCES

- [1] S. Nishimoto, M. Matsuda, M. Miyake, Photocatalytic Activities of Rh-doped  $\text{CaTiO}_3$  under Visible Light Irradiation, *Chem. Lett.* 35 (2006) 308–309. <https://doi.org/10.1246/cl.2006.308>.
- [2] P. Xie, F. Yang, R. Li, C. Ai, C. Lin, S. Lin, Improving hydrogen evolution activity of perovskite  $\text{BaTiO}_3$  with Mo doping: Experiments and first-principles analysis, *Int. J. Hydrog. Energy* 44 (2019) 11695–11704. <https://doi.org/10.1016/j.ijhydene.2019.03.145>.
- [3] D. Zhong, W. Liu, P. Tan, A. Zhu, Y. Liu, X. Xiong, J. Pan, Insights into the synergy effect of anisotropic {001} and {230} facets of  $\text{BaTiO}_3$  nanocubes sensitized with CdSe quantum dots for photocatalytic water reduction, *Appl. Catal. B Environ.* 227 (2018) 1–12.
- [4] K.H. Reddy, K. Parida, Fabrication, Characterization, and Photoelectrochemical Properties of Cu-Doped  $\text{PbTiO}_3$  and Its Hydrogen Production Activity, *ChemCatChem* 5 (2013) 3812–3820. <https://doi.org/10.1002/cctc.201300462>.
- [5] L. Paramanik, K.H. Reddy, S. Sultana, K. Parida, Architecture of Biperovskite-Based  $\text{LaCrO}_3/\text{PbTiO}_3$  p–n Heterojunction with a Strong Interface for Enhanced Charge Anti-recombination Process and Visible Light-Induced Photocatalytic Reactions, *Inorg. Chem.* 57 (2018) 15133–15148. <https://doi.org/10.1021/acs.inorgchem.8b02364>.
- [6] R. Konta, T. Ishii, H. Kato, A. Kudo, Photocatalytic activities of noble metal ion doped  $\text{SrTiO}_3$  under visible light irradiation, *J Phys Chem B* 108 (2004). <https://doi.org/10.1021/jp049556p>.
- [7] T. Ishii, H. Kato, A. Kudo,  $\text{H}_2$  evolution from an aqueous methanol solution on  $\text{SrTiO}_3$  photocatalysts codoped with chromium and tantalum ions under visible light irradiation,

- J. Photochem. Photobiol. Chem. 163 (2004) 181–186. [https://doi.org/10.1016/S1010-6030\(03\)00442-8](https://doi.org/10.1016/S1010-6030(03)00442-8).
- [8] R. Niishiro, H. Kato, A. Kudo, Nickel and either tantalum or niobium-codoped TiO<sub>2</sub> and SrTiO<sub>3</sub> photocatalysts with visible-light response for H<sub>2</sub> or O<sub>2</sub> evolution from aqueous solutions, *Phys Chem Chem Phys* 7 (2005) 2241–2245. <https://doi.org/10.1039/B502147B>.
- [9] W. Chen, H. Liu, X. Li, S. Liu, L. Gao, L. Mao, Z. Fan, W. Shangguan, W. Fang, Y. Liu, Polymerizable complex synthesis of SrTiO<sub>3</sub>:(Cr/Ta) photocatalysts to improve photocatalytic water splitting activity under visible light, *Appl. Catal. B Environ.* 192 (2016) 145–151.
- [10] D.W. Hwang, H.G. Kim, J.S. Lee, J. Kim, W. Li, S.H. Oh, Photocatalytic Hydrogen Production from Water over M-Doped La<sub>2</sub>Ti<sub>2</sub>O<sub>7</sub> (M = Cr, Fe) under Visible Light Irradiation ( $\lambda > 420$  nm), *J. Phys. Chem. B* 109 (2005) 2093–2102. <https://doi.org/10.1021/jp0493226>.
- [11] D. Xu, S. Yang, Y. Jin, M. Chen, W. Fan, B. Luo, W. Shi, Ag-decorated ATaO<sub>3</sub> (A= K, Na) nanocube plasmonic photocatalysts with enhanced photocatalytic water-splitting properties, *Langmuir* 31 (2015) 9694–9699.
- [12] M. Yang, X. Huang, S. Yan, Z. Li, T. Yu, Z. Zou, Improved hydrogen evolution activities under visible light irradiation over NaTaO<sub>3</sub> codoped with lanthanum and chromium, *Mater. Chem. Phys.* 121 (2010) 506–510. <https://doi.org/10.1016/j.matchemphys.2010.02.015>.
- [13] S.P. Adhikari, Z.D. Hood, H. Wang, R. Peng, A. Krall, H. Li, V.W. Chen, K.L. More, Z. Wu, S. Geyer, Enhanced visible light photocatalytic water reduction from a g-C<sub>3</sub>N<sub>4</sub>/SrTa<sub>2</sub>O<sub>6</sub> heterojunction, *Appl. Catal. B Environ.* 217 (2017) 448–458.

- [14] W.C. Balcerski, S.Y. Ryu, M.R. Hoffmann, Photocatalytic hydrogen production with visible light using nanocomposites of CdS and Ni on niobium oxide, *Sep. Purif. Technol.* 156 (2015) 915–921.
- [15] C. Zhou, Y. Zhao, L. Shang, R. Shi, L.-Z. Wu, C.-H. Tung, T. Zhang, Facile synthesis of ultrathin SnNb<sub>2</sub>O<sub>6</sub> nanosheets towards improved visible-light photocatalytic H<sub>2</sub>-production activity, *Chem Commun* 52 (2016) 8239–8242. <https://doi.org/10.1039/C6CC03739A>.
- [16] K. Xu, H. Xu, G. Feng, J. Feng, Photocatalytic hydrogen evolution performance of NiS cocatalyst modified LaFeO<sub>3</sub>/g-C<sub>3</sub>N<sub>4</sub> heterojunctions, *New J. Chem.* 41 (2017) 14602–14609. <https://doi.org/10.1039/C7NJ03120C>.
- [17] M. Lv, Y. Xie, Y. Wang, X. Sun, F. Wu, H. Chen, S. Wang, C. Shen, Z. Chen, S. Ni, Bismuth and chromium co-doped strontium titanates and their photocatalytic properties under visible light irradiation, *Phys. Chem. Chem. Phys.* 17 (2015) 26320–26329.
- [18] X. Sun, Y. Xie, F. Wu, H. Chen, M. Lv, S. Ni, G. Liu, X. Xu, Photocatalytic Hydrogen Production over Chromium Doped Layered Perovskite Sr<sub>2</sub>TiO<sub>4</sub>, *Inorg. Chem.* 54 (2015) 7445–7453. <https://doi.org/10.1021/acs.inorgchem.5b01042>.
